# Supplementary material
Source: Springer Nature journal article supplement (https://www.springermedizin.de/resource/supplementary/12894_2013_289_MOESM5_ESM.pdf/9513384)

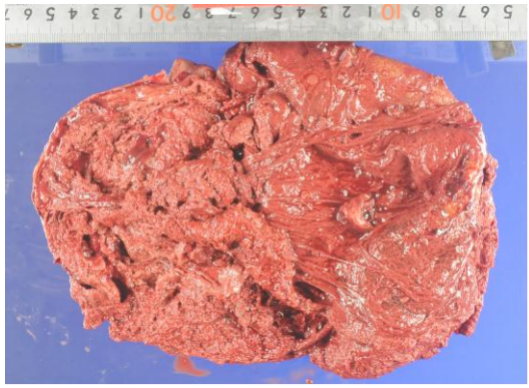

Supplement: MOESM5 [file 9513384]
